# Supplementary material for: A Novel Procedure for Knee Flexion Angle Estimation Based on Functionally Defined Coordinate Systems and Independent of the Marker Landmarks
Source: MDPI journal article supplement (doi:10.3390/ijerph20010500), 2022-12-28

# Estimating the invariant knee angle from the measured poses of femur {fm} and tibia {tb}: flowchart of the method.

Annex to:

*Ancillao A., Verduyn A., Vochten M., Aertbeliën E., De Schutter J. - A novel procedure for the estimation of knee angles based on functionally defined coordinate systems and independent of the marker landmarks*

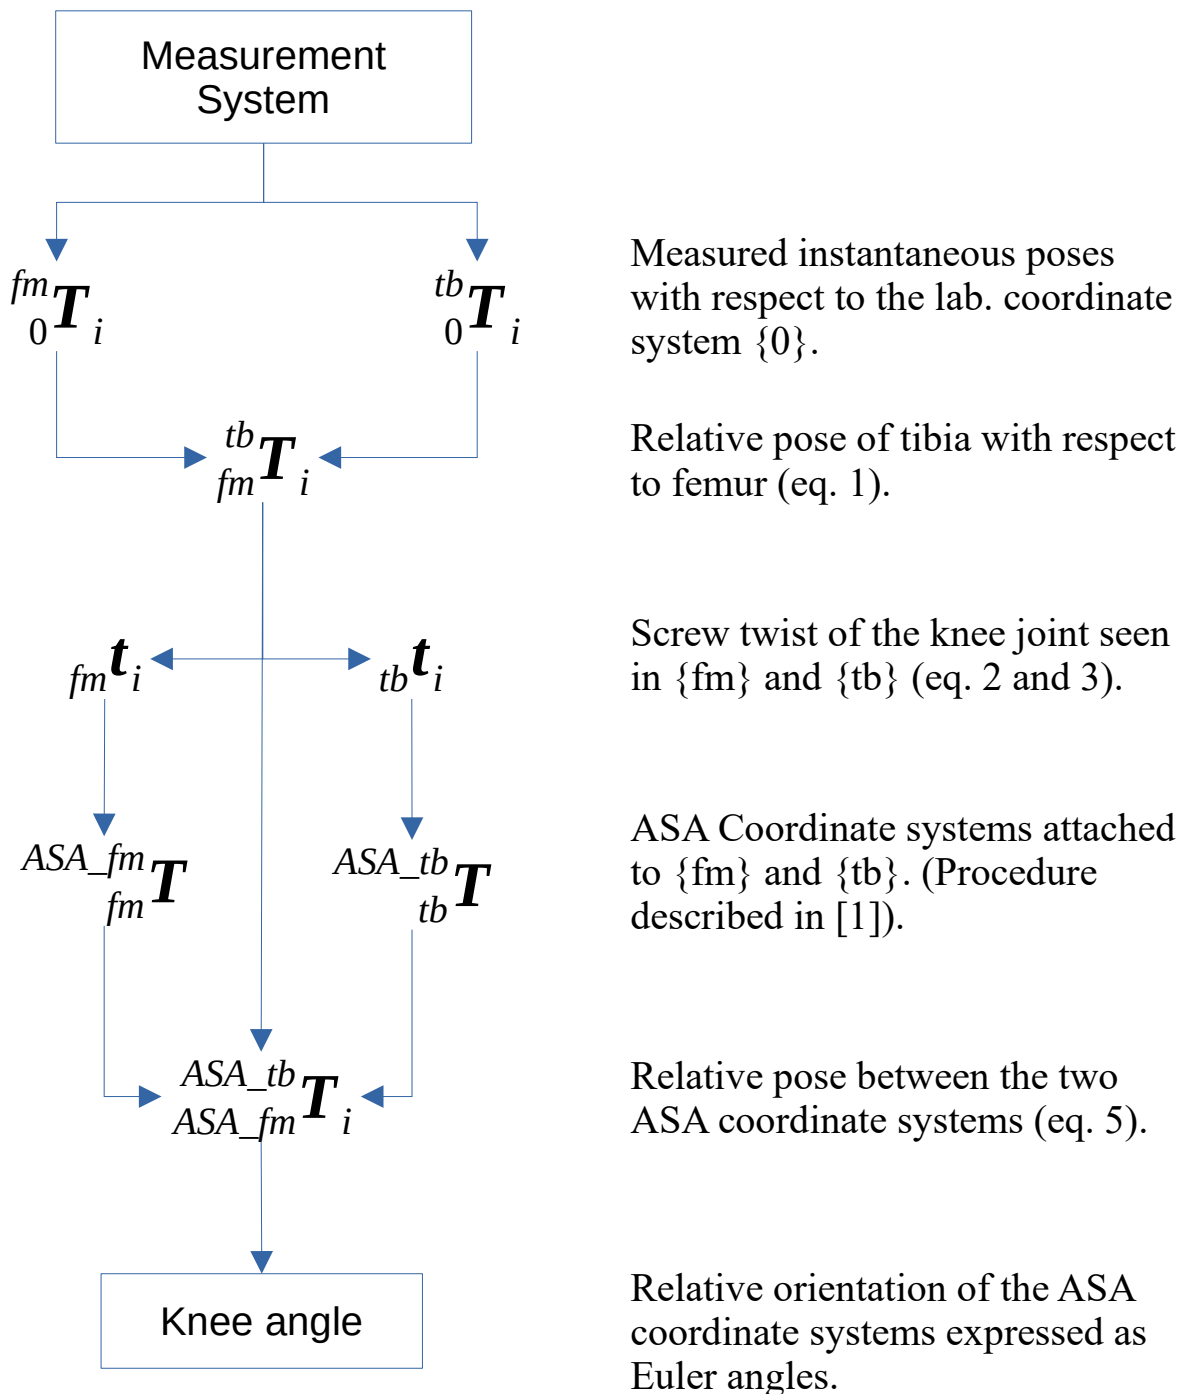

Supplement: s1 [file s1]
